# Supplementary material for: Prediction of Parkinson’s Disease Risk Based on Genetic Profile and Established Risk Factors
Source: MDPI journal article supplement (doi:10.3390/genes12081278), 2021-08-20
Supplement: s1 [file s1]

**Table S1:** Demographic characteristics and lifestyle/environmental exposure risk factors of Cypriot PD cases and controls after imputation.

**Table S2:** Univariate logistic regression analysis of lifestyle/environmental risk factors after imputation.

**Table S3:** ORs, 95% CI and distribution of cases and controls in PRS quartiles after imputation.

**Table S4:** ORs, 95% CI and distribution of cases and controls in BMI quartiles after imputation.

**Table S5:** Stepwise-regression analysis by forward selection, backward elimination and bidirectional elimination approaches using the imputed data.

**Table S6:** ORs, 95%CI and distribution of cases and controls in deciles of the final multivariate-model after imputation.

**Figure S1:** PRS distribution between PD cases and controls after imputation. This plot shows the probability density versus PRS in cases and controls.

**Figure S2:** Cases and controls distribution in deciles using the multivariable model after imputation. The distribution of cases and controls are described in blue and orange, respectively.

**Figure S3:** OR by decile of the multivariable model after imputation.
