# Supplementary material for: Prediction of Parkinson’s Disease Risk Based on Genetic Profile and Established Risk Factors
Source: Genes (Basel). 2021 Aug 20;12(8):1278. doi: 10.3390/genes12081278 (PMC8393959; doi:10.3390/genes12081278)
Supplement: Supplementary file 1 [file genes-12-01278-s001.zip]

Archive with 10 entries (10 files):
- Figure S1.pdf
- Figure S2.pdf
- Figure S3.pdf
- Supplementary file legends.pdf
- Table S1.xlsx
- Table S2.xlsx
- Table S3.xlsx
- Table S4.xlsx
- Table S5.xlsx
- Table S6.xlsx
