# Supplementary material for: Prediction of Parkinson’s Disease Risk Based on Genetic Profile and Established Risk Factors
Source: Genes (Basel). 2021 Aug 20;12(8):1278. doi: 10.3390/genes12081278 (PMC8393959; doi:10.3390/genes12081278)
Supplement: Supplementary file 1 [file genes-12-01278-s001.zip › Table S1.xlsx]

## Sheet: Sheet1
			Controls	Cases
	Age (years, mean ± SD)		65.17± 0.71	68.85± 0.71
	Age of onset (mean ± SD)		60.32± 11.38
	BMI		28.18 ± 0.66	26.24 ± 4.77
	Variable	Total n (%)	Controls n (%)	Cases n (%)
Gender	Male	359(51.36)	231(49.78)	128(54.47)
	Female	340(48.64)	233(50.22)	107(45.53)
Outdoor work	No	526(75.25)	358(77.16)	168(71.49)
	Yes	173(24.75)	106(22.84)	67(28.51)
Pesticides or toxic substances	No	384(54.94)	261(56.25)	123(52.34)
	Yes	315(45.06)	203(43.75)	112(47.66)
Pesticides exposure	No	462(66.09)	309(66.59)	153(65.11)
	Yes	237(33.91)	155(33.41)	82(34.89)
Well water drinking	No	303(43.35)	204(43.97)	99(42.13)
	Yes	396(56.65)	260(56.03)	136(57.87)
Head injury	No	498(71.24)	346(74.57)	152(64.68)
	Yes	201(28.76)	118(25.43)	83(35.32)
Family history of PD	No	585(83.69)	426(91.81)	159(67.66)
	Yes	114(16.31)	38(8.19)	76(32.34)
Hypertension	No	409(58.51)	271(58.41)	138(58.72)
	Yes	290(41.49)	193(41.59)	97(41.28)
Statin use	No	474(67.81)	320(68.97)	154(65.53)
	Yes	225(32.19)	144(31.03)	81(34.47)
Depression	No	548(78.40)	415(89.44)	133(56.60)
	Yes	151(21.60)	49(10.56)	102(43.40)
Smoking (current or ever)	No	360(51.5)	228(49.14)	132(56.17)
	Yes	339(48.5)	236(50.86)	103(43.83)
Physical activity	No	507(72.53)	335(72.2)	172(73.19)
	Yes	192(27.47)	129(27.8)	63(26.81)
Coffee consumption	No	32(4.58)	19(4.09)	13(5.53)
	Yes	667(95.42)	445(95.91)	222(94.47)
