# Supplementary material for: Prediction of Parkinson’s Disease Risk Based on Genetic Profile and Established Risk Factors
Source: Genes (Basel). 2021 Aug 20;12(8):1278. doi: 10.3390/genes12081278 (PMC8393959; doi:10.3390/genes12081278)
Supplement: Supplementary file 1 [file genes-12-01278-s001.zip › Table S2.xlsx]

## Sheet: Sheet1
	p-value	OR (95% CI)	AUC
PRS	0.0187	1.39 (1.06-1.83)	0.55
Age	7.28e-06	1.04 (1.02-1.05)	0.62
Gender (female)	0.242	0.83 (0.60-1.13)	0.52
Outdoor work	0.102	1.35 (0.94-1.92)	0.53
Pesticides or toxic substances	0.327	1.17 (0.85-1.60)	0.52
Pesticides	0.695	1.07 (0.77-1.48)	0.51
Well water drinking	0.643	1.08 (0.79-1.48)	0.51
Head injury	0.00657	1.60 (1.14-2.25)	0.55
Family history of PD	1.96e-14	5.36 (3.51-8.31)	0.62
Hypertension	0.936	0.99 (0.72-1.36)	0.5
Statin use	0.359	1.17 (0.84-1.63)	0.52
Depression	<2.00E-16	6.61 (4.49-9.85)	0.67
Smoking (current or ever)	0.0792	0.75 (0.55-1.03)	0.54
Physical activity	0.781	0.95 (0.67-1.35)	0.5
BMI	1.37e-06	0.91 (0.88-0.95)	0.61
Coffee consumption	0.392	0.73 (0.36-1.54)	0.51
