# Supplementary material for: Prediction of Parkinson’s Disease Risk Based on Genetic Profile and Established Risk Factors
Source: Genes (Basel). 2021 Aug 20;12(8):1278. doi: 10.3390/genes12081278 (PMC8393959; doi:10.3390/genes12081278)
Supplement: Supplementary file 1 [file genes-12-01278-s001.zip › Table S3.xlsx]

## Sheet: Sheet1
PRS score quartiles	Controls n(%)	Cases n(%)	P-value	OR (95% CI)
0-25%	114(24.6)	44(18.7)	0.206	0.74 (0.46-1.18)
*25-50%	117(25.2)	61(26)
50-75%	112(24.1)	59(25.1)	0.963	1.01 (0.65-1.57)
75-100%	121(26.1)	71(30.2)	0.587	1.13 (0.74-1.73)
*Reference range
