# Supplementary material for: Prediction of Parkinson’s Disease Risk Based on Genetic Profile and Established Risk Factors
Source: Genes (Basel). 2021 Aug 20;12(8):1278. doi: 10.3390/genes12081278 (PMC8393959; doi:10.3390/genes12081278)
Supplement: Supplementary file 1 [file genes-12-01278-s001.zip › Table S4.xlsx]

## Sheet: Sheet1
BMI categories	Controls n(%)	Cases n(%)	P-value	OR (95% CI)
Underweight (<20)	10 (2.2)	18 (7.7)	0.0195	2.68 (1.19-6.32)
*Normal (20-24.94)	113 (24.4)	76 (32.3)
Obesity (24.95-29.94)	146 (31.5)	38 (16.2)	5.3e-05	0.39 (0.24-0.61)
Overweight (>29.95)	195 (42.0)	103 (43.8)	0.2081	0.79 (0.54-1.15)
*Reference range
