# Supplementary material for: Prediction of Parkinson’s Disease Risk Based on Genetic Profile and Established Risk Factors
Source: Genes (Basel). 2021 Aug 20;12(8):1278. doi: 10.3390/genes12081278 (PMC8393959; doi:10.3390/genes12081278)
Supplement: Supplementary file 1 [file genes-12-01278-s001.zip › Table S5.xlsx]

## Sheet: Sheet1
	P-value	OR (95% CI)
(Intercept)	0.548288	0.56(0.09-3.66)
PRS score	0.040162	1.41(1.02-1.95)
Current age	0.001986	1.03(1.01-1.05)
Gender	0.000502	0.44(0.28-0.7)
Head injury	0.001666	1.89(1.27-2.82)
Family history of PD	1.02e-11	5.36(3.33-8.77)
Depression	<2.00E-16	6.9(4.46-10.85)
Smoking (current or ever)	0.013149	0.57(0.36-0.89)
BMI	4.95e-05	0.91(0.87-0.95)
AUC (95% CI)	0.80 (0.77-0.84)
GOF	0.2931
