# Supplementary material for: Prediction of Parkinson’s Disease Risk Based on Genetic Profile and Established Risk Factors
Source: Genes (Basel). 2021 Aug 20;12(8):1278. doi: 10.3390/genes12081278 (PMC8393959; doi:10.3390/genes12081278)
Supplement: Supplementary file 1 [file genes-12-01278-s001.zip › Table S6.xlsx]

## Sheet: Sheet1
Deciles	OR (95% CI)	P-value	Controls	Controls (%)	Cases	Cases (%)
0-10%	0.15(0.04-0.44)	0.001274	83	17.9	4	1.7
10-20%	0.55(0.22-1.32)	0.189269	52	11.2	9	3.8
20-30%	0.47(0.19-1.09)	0.082411	68	14.7	10	4.3
30-40%	1.01(0.44-2.27)	0.979505	44	9.5	14	6
40-50%*			54	11.6	17	7.2
50-60%	0.87(0.39-1.91)	0.721579	55	11.9	15	6.4
60-70%	1.15(0.53-2.51)	0.726414	47	10.1	17	7.2
70-80%	3.63(1.81-7.52)	0.000366	35	7.5	40	17
80-90%	9(4.28-19.88)	1.84e-08	18	3.9	51	21.7
90-100%	23.03(9.64-61.36)	2.17e-11	8	1.7	58	24.7
*Reference range
