# Supplementary figures and images for: Prediction of Parkinson’s Disease Risk Based on Genetic Profile and Established Risk Factors
Source: MDPI journal article supplement (doi:10.3390/genes12081278), 2021-08-20

Deciles

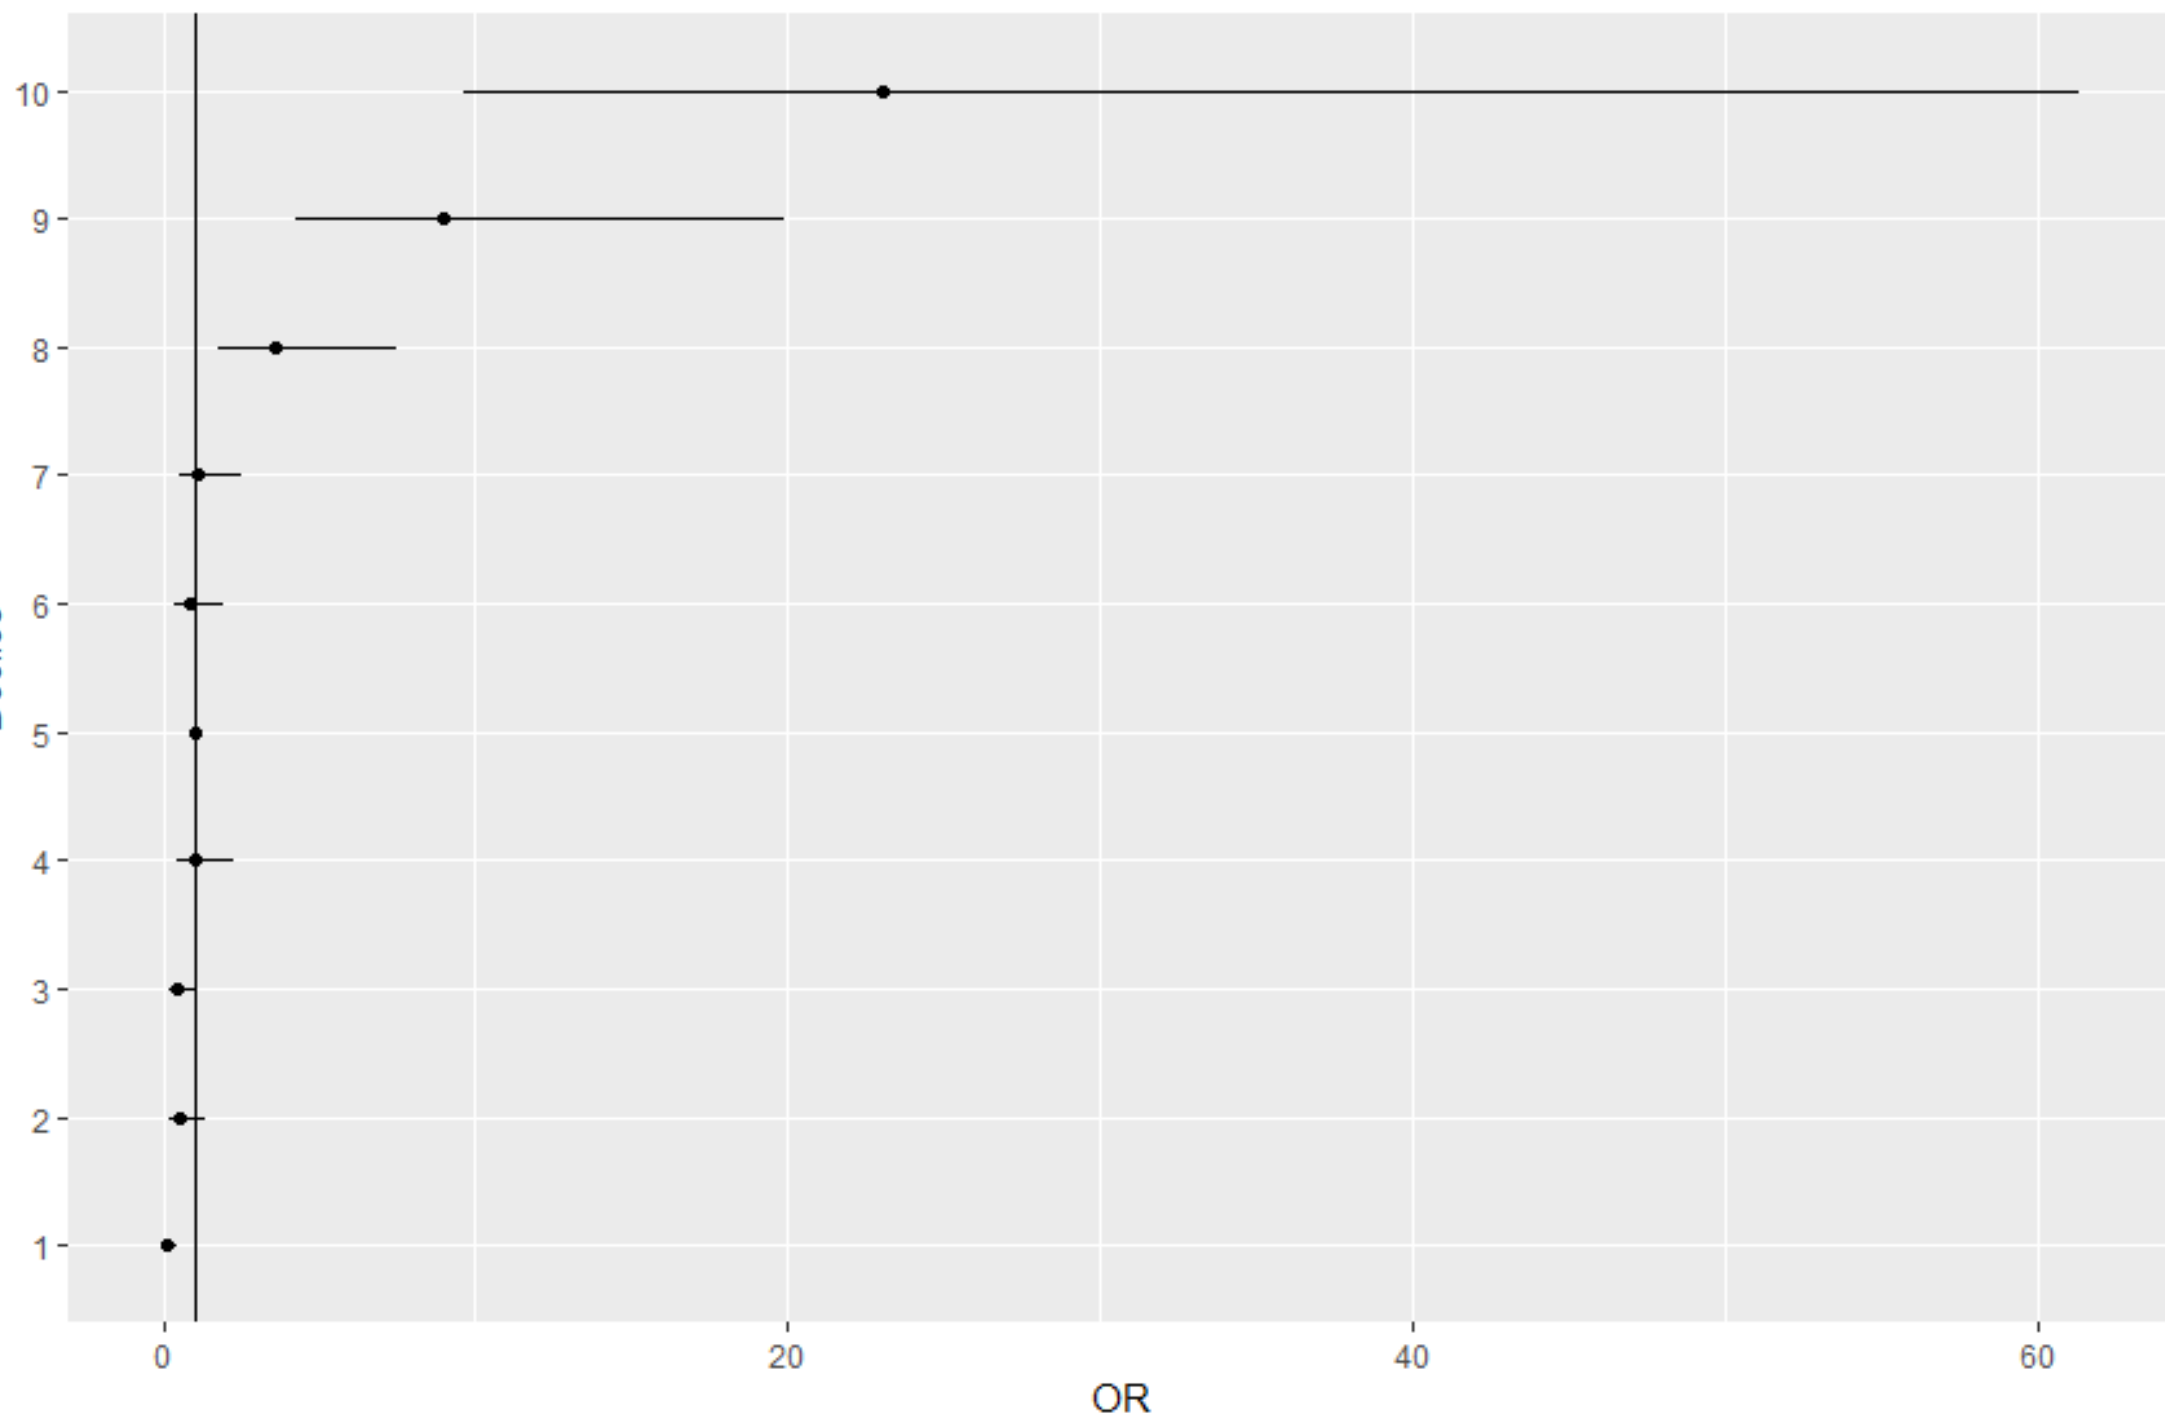

Supplement: s1 [file s1]

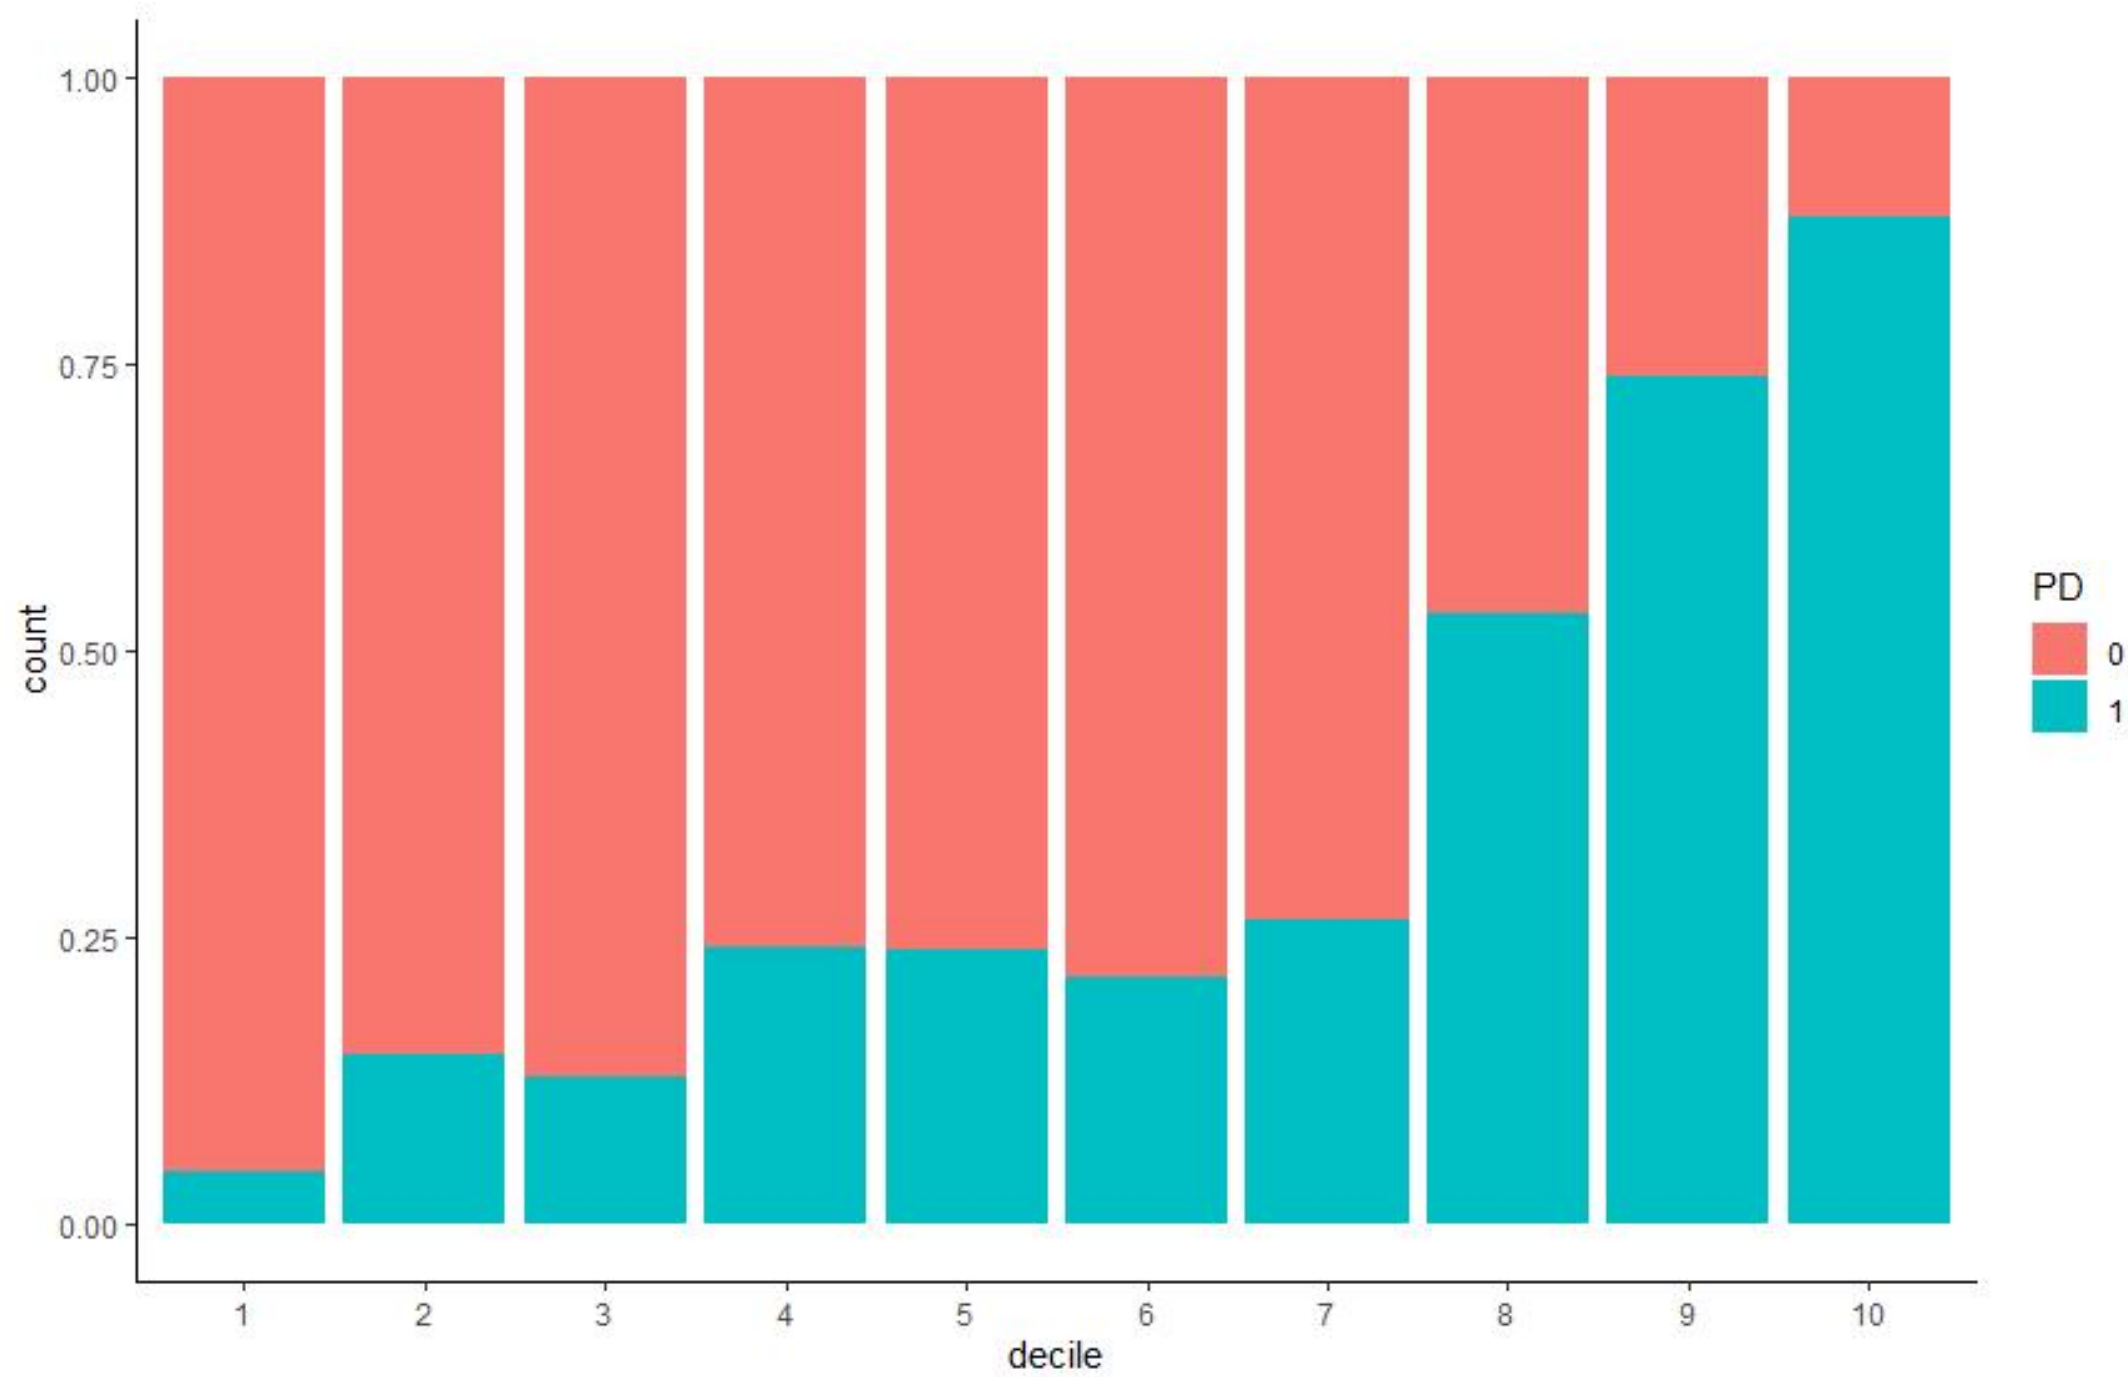

Supplement: s1 [file s1]

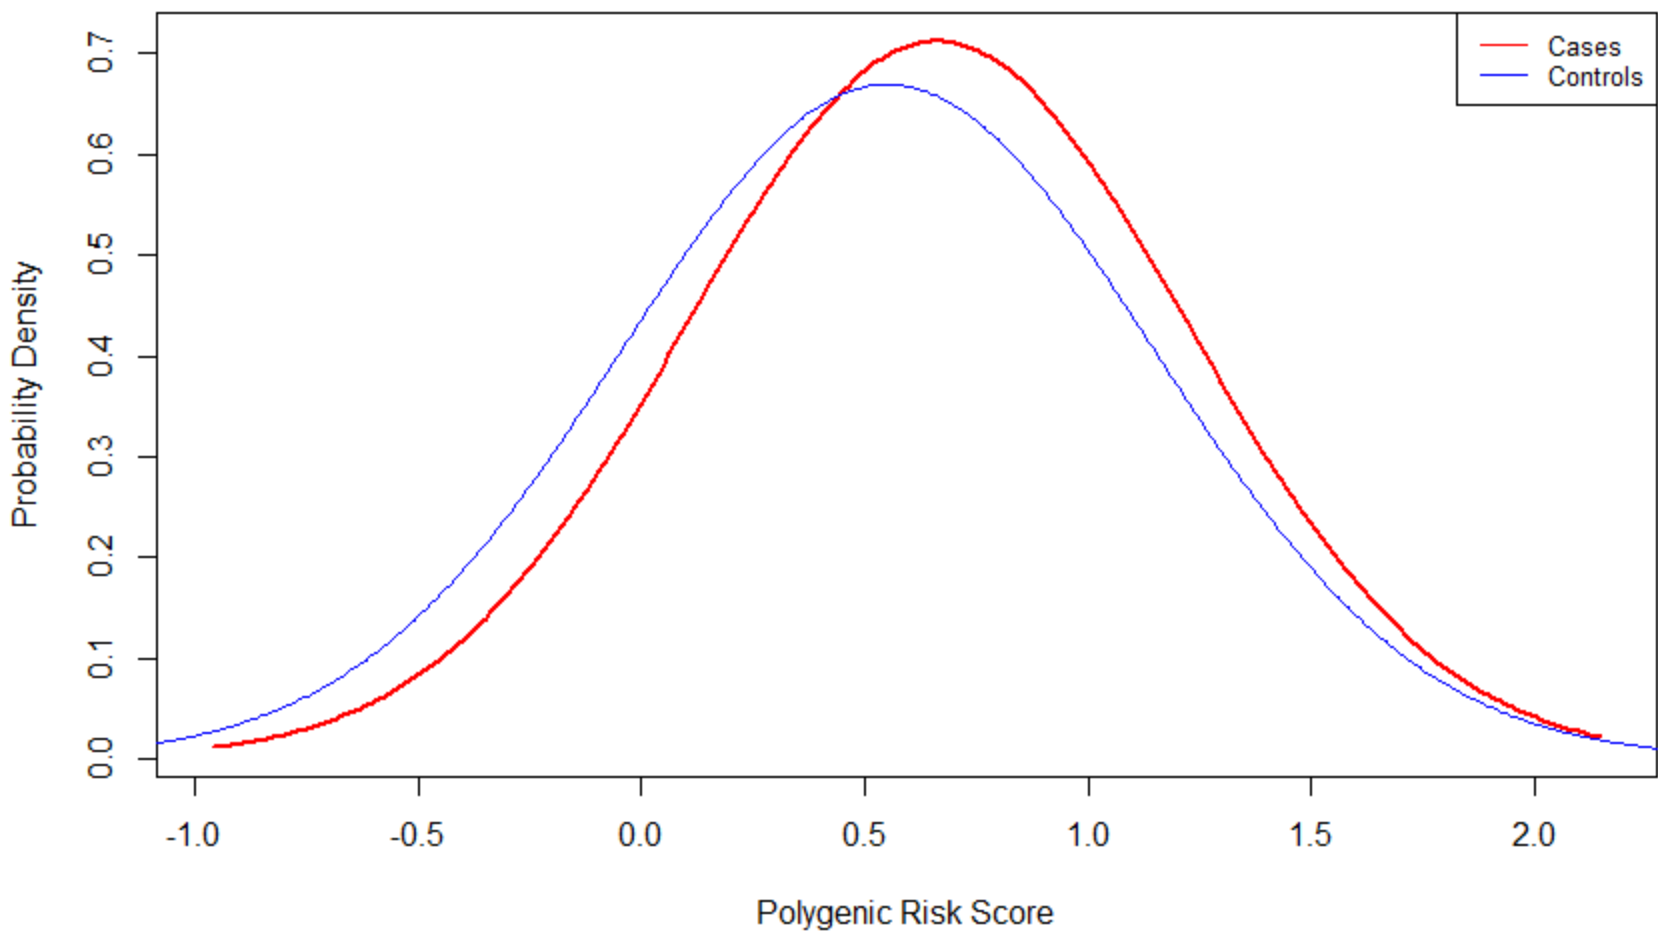

Supplement: s1 [file s1]
